# Supplementary material
Source: Springer Nature journal article supplement (https://www.springermedizin.de/resource/supplementary/13256_2013_3119_MOESM1_ESM.pdf/9650398)

PPU., D.P., MR.

AH

A  
MF

-Oct-69, M, 44Y

JDY 1  
Oct-13  
8:10 PM  
2 IMA 14 / 19

F 1.38

2500.0  
R 9000.0  
E 92.0  
A 01:03\*2  
W 190.0  
2 MNORM/DIS2D/FSM

1/IR/FS  
HE1-4;NE2;SP1  
ir2d1\_16 / 150

620-----353630

AH

TP  
SP H  
SL 5.0  
FoV 201  
448\*5  
Tra>Cor(  
w 1  
C  
Durdans Hos  
Av  
MB

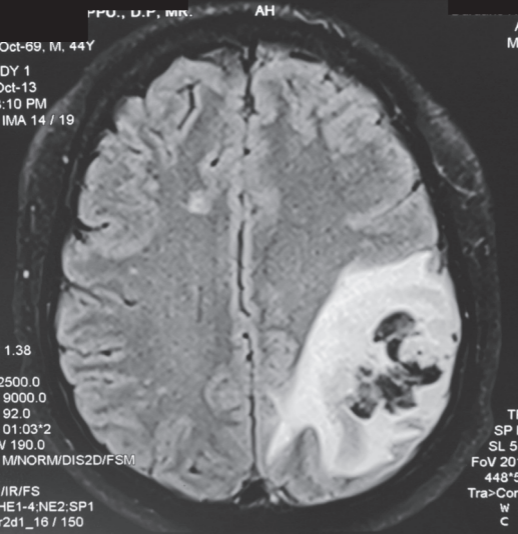

Supplement: MOESM1 [file 9650398]
